# Supplementary material for: Polymeric Dental Nanomaterials: Antimicrobial Action
Source: MDPI journal article supplement (doi:10.3390/polym14050864), 2022-02-22
Supplement: s1 [file s1]

## Supplementary Materials

**Table S1.** Antimicrobial action of nanoparticles and their fields of application in dentistry.

| Nanoparticles        | Antimicrobial action                                                                                                                                   | Intended area of application                                                                      | References |
|----------------------|--------------------------------------------------------------------------------------------------------------------------------------------------------|---------------------------------------------------------------------------------------------------|------------|
| Silver nanoparticles | Activity against <i>Streptococcus mutans</i> , <i>Staphylococcus aureus</i> and <i>Escherichia coli</i> bacteria                                       | Coatings for orthodontic appliances                                                               | [37]       |
|                      | Activity against <i>Enterococcus faecalis</i> bacteria                                                                                                 | Additives to endodontic sealer                                                                    | [50]       |
|                      | Activity against <i>Streptococcus mutans</i> bacteria                                                                                                  | Components of toothpastes for the prevention of caries                                            | [59]       |
|                      | Inhibition of the growth of <i>Streptococcus mutans</i> , <i>Streptococcus salivarius</i> and <i>Lactobacillus acidophilus</i> bacteria                | Additives to filling and restorative materials, adhesives for tooth restoration in dental therapy | [66]       |
|                      | Inhibition of the growth of <i>Streptococcus mutans</i> bacteria                                                                                       | Fillers for dental restoration in dental therapy                                                  | [67]       |
|                      | Activity against <i>Streptococcus mutans</i> bacteria                                                                                                  | Components of self-etch adhesive system in dental therapy                                         | [68]       |
|                      | Activity against <i>Treponema denticola</i> bacteria                                                                                                   | Additives to light-curing composite for orthodontic retainers                                     | [69]       |
|                      | Activity against <i>Staphylococcus aureus</i> and <i>Staphylococcus epidermidis</i> bacteria                                                           | Treatment of periodontal tissue diseases                                                          | [71]       |
|                      | Activity against <i>Streptococcus mutans</i> , <i>Streptococcus sobrinus</i> and <i>Lactobacillus acidophilus</i> bacteria                             | Additives to orthodontic adhesives                                                                | [84], [85] |
|                      | Inhibition of the growth of biofilms cariogenic <i>Streptococcus mutans</i> , <i>Streptococcus sanguis</i> , <i>Lactobacillus acidophilus</i> bacteria | Components of composite resins used in fixed orthodontic retainers                                | [86]       |
|                      | Activity against <i>Candida albicans</i> fungi                                                                                                         | Additives to materials for the manufacture of dentures and dental implants                        | [91]       |
|                      | Inhibition of the growth of biofilm <i>Candida glabrata</i> fungi                                                                                      | Additives to materials for the manufacture of dentures and dental implants                        | [92]       |
| Nanodiamond          | Activity against <i>Candida albicans</i> fungi                                                                                                         | Component of resins for the manufacture of dentures                                               | [51]       |
|                      | Activity against anaerobic <i>Streptococcus mutans</i> , <i>Streptococcus mitis</i> and <i>Lactobacillus spp.</i> bacteria                             | Fillers of polymer fillings for one-stage caries treatment                                        | [72]       |
|                      | Inhibition of the growth of biofilm <i>Candida albicans</i> fungi                                                                                      | Component of orthodontic resins for the manufacture and repair of orthodontic appliances          | [88]       |
|                      | Inhibition of the growth of <i>Streptococcus mutans</i> bacteria                                                                                       | Component of resins for the manufacture of orthodontic attachments, brackets                      | [88]       |
|                      | Reduction viability <i>Streptococcus mutans</i> bacteria                                                                                               | Component of resins for the manufacture of dentures                                               | [94]       |

|                                     |                                                                                                                                                                                             |                                                                        |            |
|-------------------------------------|---------------------------------------------------------------------------------------------------------------------------------------------------------------------------------------------|------------------------------------------------------------------------|------------|
| Zinc(II) oxide nanoparticles        | Activity against <i>Streptococcus mutans</i> bacteria                                                                                                                                       | Additives to restorative glass ionomer cements used in dental therapy  | [41]       |
|                                     | Activity against <i>Streptococcus mutans</i> , <i>Enterococcus faecalis</i> and <i>Lactobacillus fermentum</i> bacteria, and <i>Candida albicans</i> fungi                                  | Treatment of caries in dental therapy and endodontics                  | [73]       |
|                                     | Activity against <i>Porphyromonas gingivalis</i> and <i>Actinomyces naeslundii</i> bacteria                                                                                                 | Additives to sealants for endodontic treatment of apical periodontitis | [74]       |
|                                     | Activity against <i>Streptococcus mutans</i> and <i>Lactobacillus acidophilus</i> bacteria                                                                                                  | Components of adhesives for tooth restoration in dental therapy        | [75]       |
|                                     | Inhibition of the metabolic activity of biofilms cariogenic <i>Streptococcus mutans</i> , <i>Streptococcus sobrinus</i> and <i>Lactobacillus acidophilus</i> bacteria after photoactivation | Components of orthodontic adhesive for fixing orthodontic appliances   | [90]       |
|                                     |                                                                                                                                                                                             |                                                                        |            |
| Titanium(IV) oxide nanoparticles    | Activity against <i>Streptococcus mutans</i> bacteria                                                                                                                                       | Components of orthodontic adhesive for fixing orthodontic appliances   | [26]       |
|                                     | Activity against <i>Streptococcus mutans</i> bacteria                                                                                                                                       | Additives to light-curing adhesives for dental restorations            | [52]       |
|                                     | Activity against <i>Staphylococcus aureus</i> and <i>Escherichia coli</i> bacteria                                                                                                          | Fillers for maxillofacial prostheses                                   | [98]       |
| Zirconium(IV) oxide nanoparticles   | Activity against <i>Streptococcus mutans</i> and <i>Streptococcus sobrinus</i> bacteria                                                                                                     | Fillers for filling and restorative materials in dental therapy        | [77], [78] |
| Hydroxyapatite nanoparticles        | Enamel remineralization in caries-like enamel lesions induced by <i>Streptococcus mutans</i> biofilm                                                                                        | Fillers for filling and restorative materials in dental therapy        | [79]       |
|                                     | Activity against <i>Enterococcus faecalis</i> and <i>Streptococcus mitis</i> bacteria                                                                                                       | Components of root canal filling materials                             | [80]       |
| Bioactive glass nanoparticles       | Activity against gram-positive bacteria <i>Streptococcus mutans</i>                                                                                                                         | Components of orthodontic adhesive for fixing orthodontic appliances   | [58]       |
| Copper (II) oxide nanoparticles     | Inhibition of the growth of <i>Candida albicans</i> fungi                                                                                                                                   | Components of soft-denture liners                                      | [61]       |
|                                     | Inhibition of the growth of <i>Candida dubliniensis</i> fungi, <i>Streptococcus salivarius</i> , <i>Streptococcus sanguis</i> , <i>Streptococcus mutans</i> bacteria                        | Components of partial and complete removable dentures                  | [98]       |
|                                     |                                                                                                                                                                                             |                                                                        |            |
| Yttrium(III) fluoride nanoparticles | Inhibition of the growth of <i>Streptococcus mutans</i>                                                                                                                                     | Components of orthodontic composite resins                             | [58]       |
| Calcium fluoride nanoparticles      | Remineralization ability to protect enamel under biofilm <i>Streptococcus mutans</i> bacteria                                                                                               | Fillers for filling and restorative materials in dental therapy        | [59]       |
| Calcium phosphate nanoparticles     | Remineralization ability to protect enamel under biofilm <i>Streptococcus mutans</i> bacteria                                                                                               | Fillers for filling and restorative materials in dental therapy        | [83]       |
| Chitosan nanoparticles              | Inhibition of the growth of <i>Candida albicans</i> fungi, <i>Streptococcus mutans</i> , <i>Pseudomonas aeruginosa</i> and <i>Enterococcus faecalis</i> bacteria                            | Components of tissue conditioner                                       | [93]       |
| Halloysite nanotubes                | Inhibition of the growth of <i>Candida albicans</i> fungi                                                                                                                                   | Components of partial and complete removable dentures                  | [97]       |

Table S2. Major dental pathogens.

| Microorganism             | Pathology caused by a microorganism                   |
|---------------------------|-------------------------------------------------------|
| <i>S. mutans</i>          | Caries, apical periodontitis, peri-implantitis        |
| <i>E. faecalis</i>        | Apical periodontitis                                  |
| <i>S. mitis</i>           | Caries, peri-implantitis                              |
| <i>Lactobacillus spp.</i> | Caries                                                |
| <i>P. gingivalis</i>      | Apical periodontitis, periodontitis, peri-implantitis |
| <i>A. naeslundii</i>      | Apical periodontitis, periodontitis                   |
| <i>S. aureus</i>          | Caries, periodontitis, peri-implantitis               |
| <i>S. salivarius</i>      | Caries, peri-implantitis                              |
| <i>L. acidophilus</i>     | Caries                                                |
| <i>C. albicans</i>        | Oral candidosis, prosthetic stomatitis                |
| <i>C. glabrata</i>        | Oral candidosis, prosthetic stomatitis                |
| <i>C. dubliniensis</i>    | Oral candidosis, prosthetic stomatitis                |
| <i>S. sanguis</i>         | Caries, periodontitis                                 |
| <i>T. denticola</i>       | Periodontitis                                         |
| <i>S. sobrinus</i>        | Caries                                                |
| <i>E. coli</i>            | Caries                                                |

Table S3. Minimum inhibitory concentration (MIC).

| Nanoparticles                | Microorganisms                                                    | MIC, $\mu\text{g mL}^{-1}$ | References |
|------------------------------|-------------------------------------------------------------------|----------------------------|------------|
| CuO NPs (18.3 nm)            | <i>C. albicans</i>                                                | 64                         | [61]       |
|                              | <i>S. mutans</i>                                                  | 128                        |            |
|                              | <i>S. sobrinus</i>                                                | 128                        |            |
|                              | <i>S. salivarius</i>                                              | 64                         |            |
| Ag NPs                       | <i>S. mutans</i>                                                  | 12.5                       | [68]       |
|                              | <i>S. mutans</i>                                                  | 0.625                      |            |
| ZnO NPs (20 nm)              | <i>E. faecalis</i>                                                | 0.312                      | [73]       |
|                              | <i>L. fermentum</i>                                               | 5                          |            |
|                              | <i>C. albicans</i>                                                | 10                         |            |
|                              | <i>S. mutans</i>                                                  | 1.04                       |            |
| ZnO NPs (40 nm)              | <i>E. faecalis</i>                                                | 0.625                      | [73]       |
|                              | <i>L. fermentum</i>                                               | 10                         |            |
|                              | <i>C. albicans</i>                                                | >10                        |            |
|                              | <i>S. mutans</i>                                                  | 1.66                       |            |
| ZnO NPs (140 nm)             | <i>E. faecalis</i>                                                | 1.25                       | [73]       |
|                              | <i>L. fermentum</i>                                               | >10                        |            |
|                              | <i>C. albicans</i>                                                | >10                        |            |
|                              | <i>P. gingivalis</i>                                              | 10                         |            |
| ZnO NPs (10 nm)              | <i>A. naeslundii</i>                                              | 40                         | [74]       |
| MgO NPs (20 nm)              | <i>S. mutans</i> , <i>S. sobrinus</i>                             | 500                        | [78]       |
| ZnO NPs (38.19 nm)           | <i>S. mutans</i>                                                  | 32                         | [81]       |
| Cs NPs (82.87 nm)            | <i>S. mutans</i>                                                  | 2048                       |            |
| ZnO NPs + Cs NPs (185.7 nm)  | <i>S. mutans</i>                                                  | 1024                       |            |
| TiO <sub>2</sub> NPs (17 nm) | <i>S. salivarius</i> , <i>S. sanguis</i> , <i>C. dubliniensis</i> | 32-64                      | [97]       |
| CuO NPs (40 nm)              |                                                                   |                            |            |

**Table S4.** Surface roughness values ( $R_a$ ).

| Materials                                                     | Surface roughness, nm | References |
|---------------------------------------------------------------|-----------------------|------------|
| Heat-polymerized (control)                                    | 150±10                | [44]       |
| Acrylic resin reinforced with 0.5 wt.% ND                     | 60±10                 |            |
| Heat-cured PMMA (control)                                     | 150±10                | [45]       |
| Heat-cured PMMA + 5 wt. % ZrO <sub>2</sub> NPs                | 200±10                |            |
| Heat-polymerized acrylic resin Major base 20 (control)        | 129±11                | [51]       |
| Heat-polymerized acrylic resin Major base 20 + 0.5 wt. % ND   | 39±9                  |            |
| Composite resin Filtek Z350 XT (control)                      | 190±10                | [76]       |
| Composite resin Filtek Z350 XT + 2 wt. % TiO <sub>2</sub> NPs | 220±10                |            |
| Orthodontic acrylic resin system Ortho-Jet (control)          | 146.792±22.06         | [88]       |
| Orthodontic acrylic resin system Ortho-Jet + 0.1 wt. % ND     | 162.502±4.24          |            |
| Acrylate-based resin PMMA material (control)                  | 470±110               | [89]       |
| Acrylate-based resin PMMA material + 0.1 wt. % ND powder      | 480±160               |            |
| Untreated PMMA (control)                                      | 123±15                | [90]       |
| PMMA + 3 wt. % Ag NPs                                         | 61±6                  |            |
| PMMA + 3.5 wt. % Ag NPs                                       | 41±3                  | [96]       |
| Untreated PMMA (control)                                      | 142±38                |            |
| PMMA + 1 wt. % TiO <sub>2</sub> NPs                           | 65±15                 |            |
| PMMA + 3 wt. % TiO <sub>2</sub> NPs                           | 40±10                 |            |
| PMMA + 1 wt. % HNTs                                           | 38±10                 |            |
| PMMA + 3 wt. % HNTs                                           | 15±2                  |            |
| Neat silicone (control)                                       | 567±10.8              | [100]      |
| Silicone + 1 % wt. ZrO <sub>2</sub> nanopowder                | 570±6.3               |            |
